# Supplementary material
Source: publisher figshare collection journal article supplement (https://acs.figshare.com/ndownloader/files/3708190)
Supplement: Supplementary file 1 [file 3708190]

# Supporting Information: Structural properties and charge distribution of the sodium uranium, neptunium and plutonium ternary oxides: a combined X-ray diffraction and XANES study.

Anna L. Smith,<sup>\*,†,‡,¶</sup> Philippe Martin,<sup>§</sup> Damien Prieur,<sup>†</sup> Andreas C. Scheinost,<sup>||</sup>

Philippe E. Raison,<sup>†</sup> Anthony K. Cheetham,<sup>‡</sup> and Rudy J.M. Konings<sup>\*,†</sup>

*¶European Commission, Joint Research Centre (JRC), Institute for Transuranium  
Elements (ITU), P.O. Box 2340, D-76125 Karlsruhe, Germany*

*‡Department of Materials Science and Metallurgy, University of Cambridge, 27 Charles  
Babbage Road, Cambridge, CB3 0FS, United Kingdom*

*¶Current address: Delft University of Technology, Radiation Science & Technology  
Department, Nuclear Energy and Radiation Applications (NERA), Mekelweg 15, 2629 JB  
Delft, The Netherlands*

*§CEA, DEN, DEC, CEN Cadarache, 13108 St. Paul Lez Durance, France*

*||Helmholtz Zentrum Dresden Rossendorf (HZDR), Institute of Resource Ecology, P.O. Box  
10119, 01314, Dresden, Germany*

E-mail: a.l.smith@tudelft.nl; rudy.konings@ec.europa.eu

## X-ray diffraction and differential XANES data

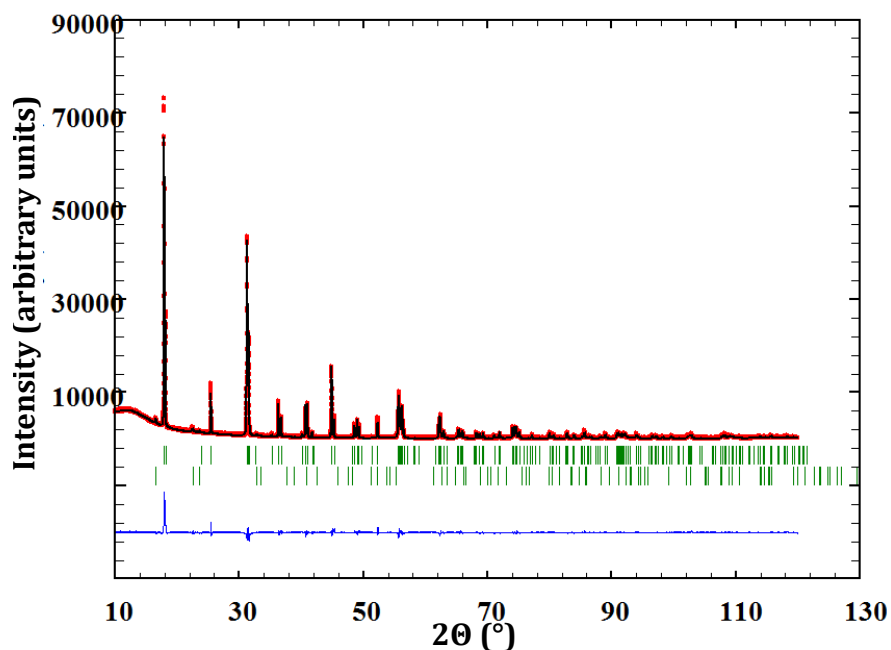

Figure S1: Comparison between the observed ( $Y_{obs}$ , in red) and calculated ( $Y_{calc}$ , in black) X-ray diffraction patterns of  $\alpha$ - $\text{Na}_2\text{UO}_4$ .  $Y_{obs}-Y_{calc}$ , in blue, is the difference between the experimental and calculated intensities. The Bragg reflections are marked in green. Upper:  $\alpha$ - $\text{Na}_2\text{UO}_4$ . Lower:  $\text{Na}_4\text{UO}_5$ . Measurement at  $\lambda = \text{Cu-K}\alpha 1$ .

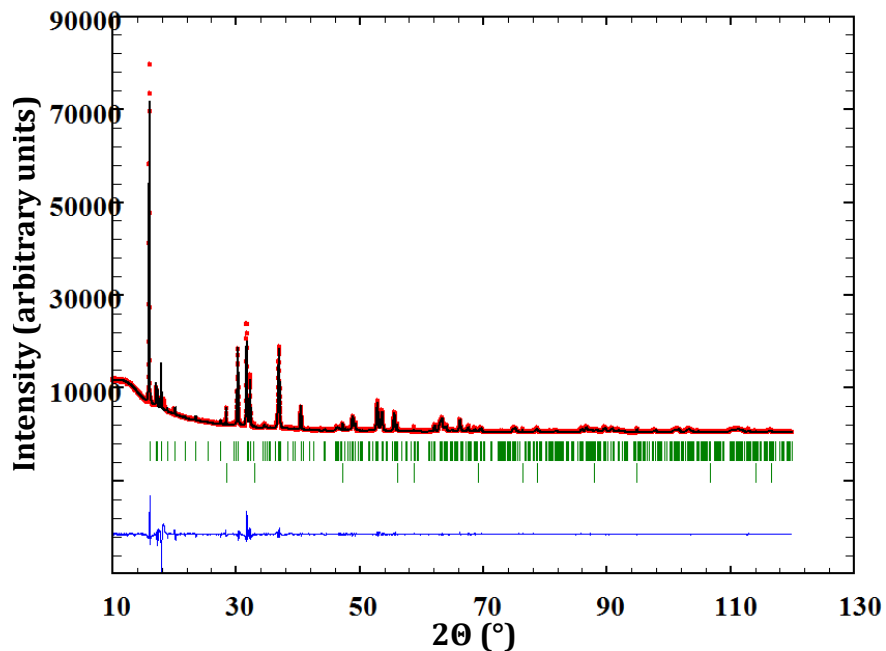

Figure S2: Le Bail fit of  $\text{Na}_2\text{NpO}_3$ . Comparison between the observed ( $Y_{obs}$ , in red) and calculated ( $Y_{calc}$ , in black) X-ray diffraction patterns.  $Y_{obs}-Y_{calc}$ , in blue, is the difference between the experimental and calculated intensities. The Bragg reflections are marked in green. Measurement at  $\lambda = \text{Cu-K}\alpha 1$ .

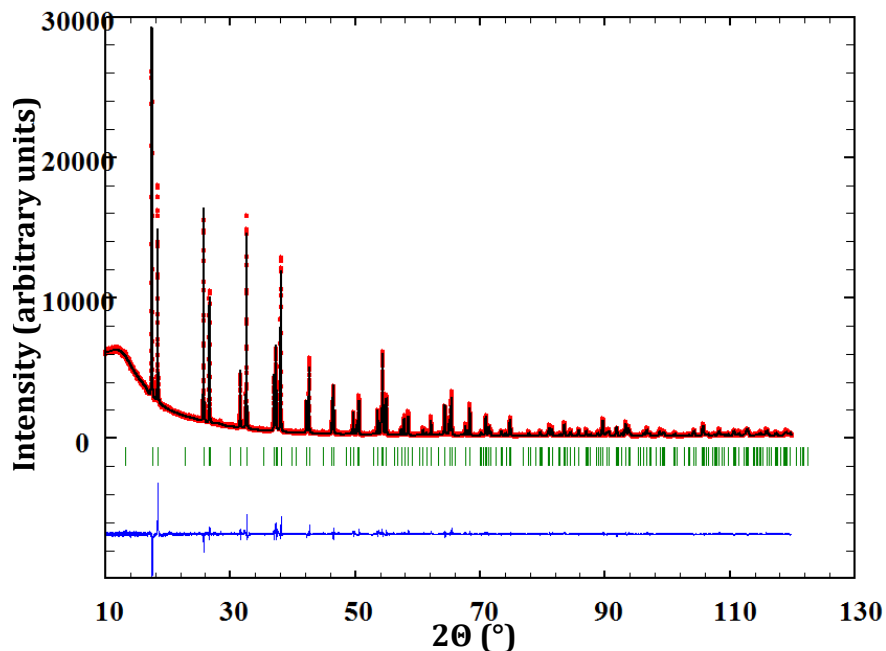

Figure S3: Comparison between the observed ( $Y_{obs}$ , in red) and calculated ( $Y_{calc}$ , in black) X-ray diffraction patterns of  $\alpha\text{-Na}_3\text{NpO}_4$ .  $Y_{obs}-Y_{calc}$ , in blue, is the difference between the experimental and calculated intensities. The Bragg reflections are marked in green. Measurement at  $\lambda = \text{Cu-K}\alpha 1$ .

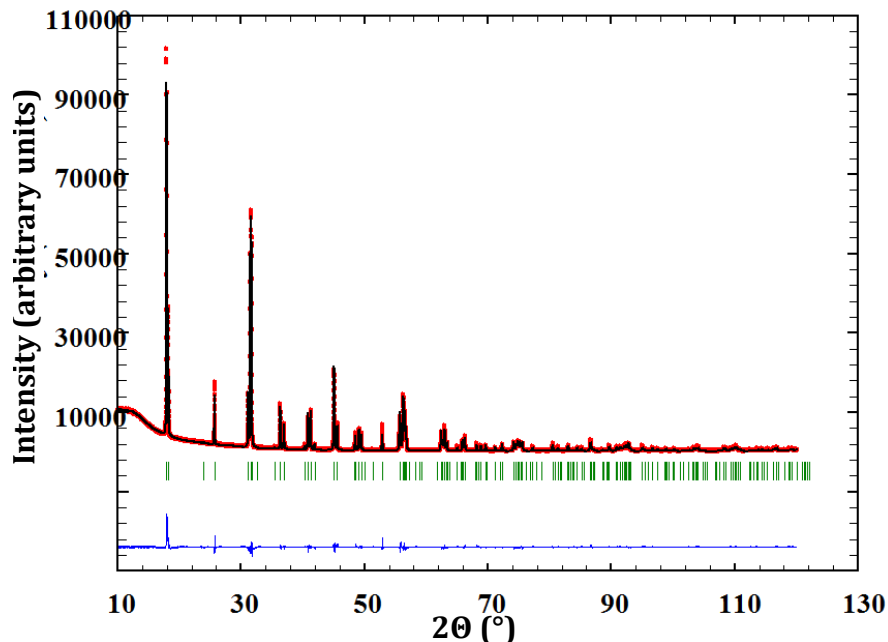

Figure S4: Comparison between the observed ( $Y_{obs}$ , in red) and calculated ( $Y_{calc}$ , in black) X-ray diffraction patterns of  $\alpha$ - $\text{Na}_2\text{NpO}_4$ .  $Y_{obs}-Y_{calc}$ , in blue, is the difference between the experimental and calculated intensities. The Bragg reflections are marked in green. Measurement at  $\lambda = \text{Cu-K}\alpha 1$ .

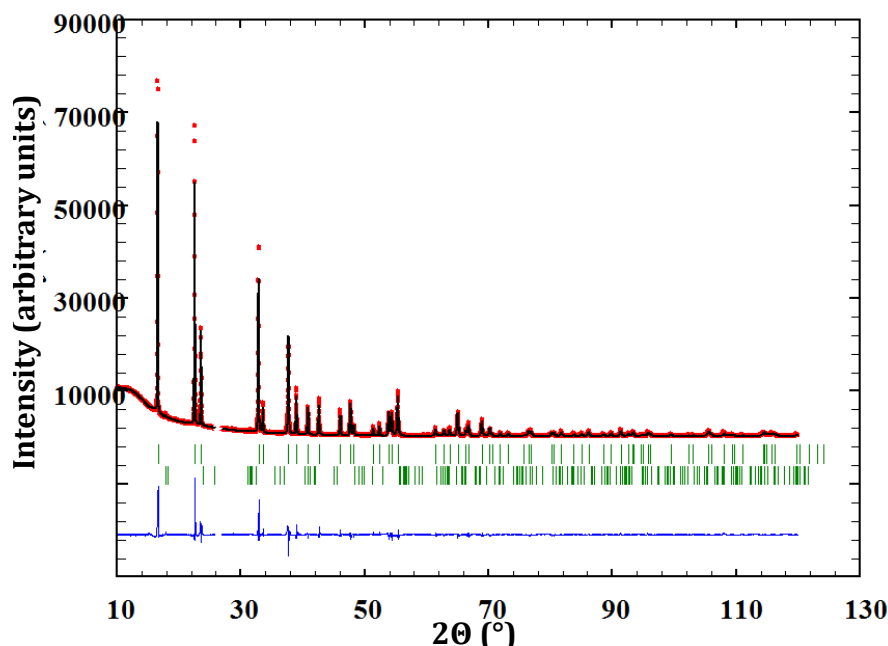

Figure S5: Comparison between the observed ( $Y_{obs}$ , in red) and calculated ( $Y_{calc}$ , in black) X-ray diffraction patterns of  $\text{Na}_4\text{NpO}_5$ .  $Y_{obs}-Y_{calc}$ , in blue, is the difference between the experimental and calculated intensities. The Bragg reflections are marked in green. Upper:  $\text{Na}_4\text{NpO}_5$ . Lower:  $\alpha$ - $\text{Na}_2\text{NpO}_4$ . Measurement at  $\lambda = \text{Cu-K}\alpha 1$ .

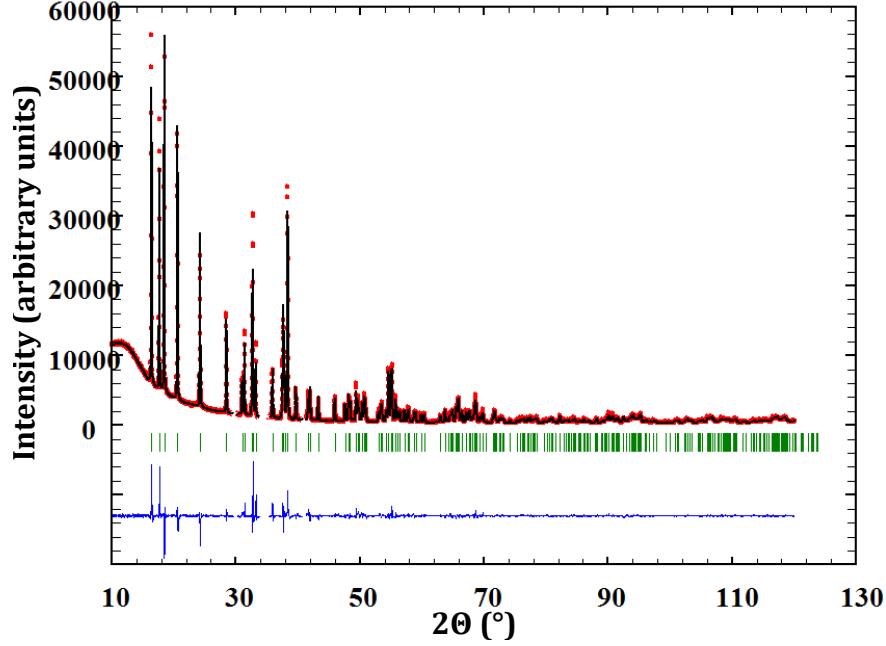

Figure S6: Comparison between the observed ( $Y_{obs}$ , in red) and calculated ( $Y_{calc}$ , in black) X-ray diffraction patterns of  $\text{Na}_5\text{NpO}_6$ .  $Y_{obs}-Y_{calc}$ , in blue, is the difference between the experimental and calculated intensities. The Bragg reflections are marked in green. Measurement at  $\lambda = \text{Cu-K}\alpha 1$ .

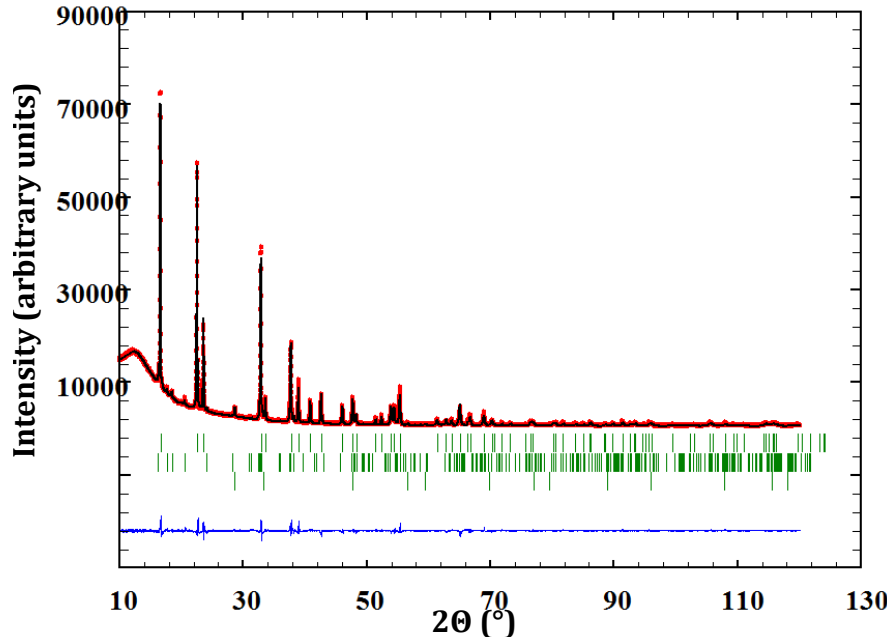

Figure S7: Comparison between the observed ( $Y_{obs}$ , in red) and calculated ( $Y_{calc}$ , in black) X-ray diffraction patterns of  $\text{Na}_4\text{PuO}_5$ .  $Y_{obs}-Y_{calc}$ , in blue, is the difference between the experimental and calculated intensities. The Bragg reflections are marked in green. Upper:  $\text{Na}_4\text{PuO}_5$ . Lower:  $\text{Na}_5\text{PuO}_6$  and  $\text{PuO}_2$ . Measurement at  $\lambda = \text{Cu-K}\alpha 1$ .

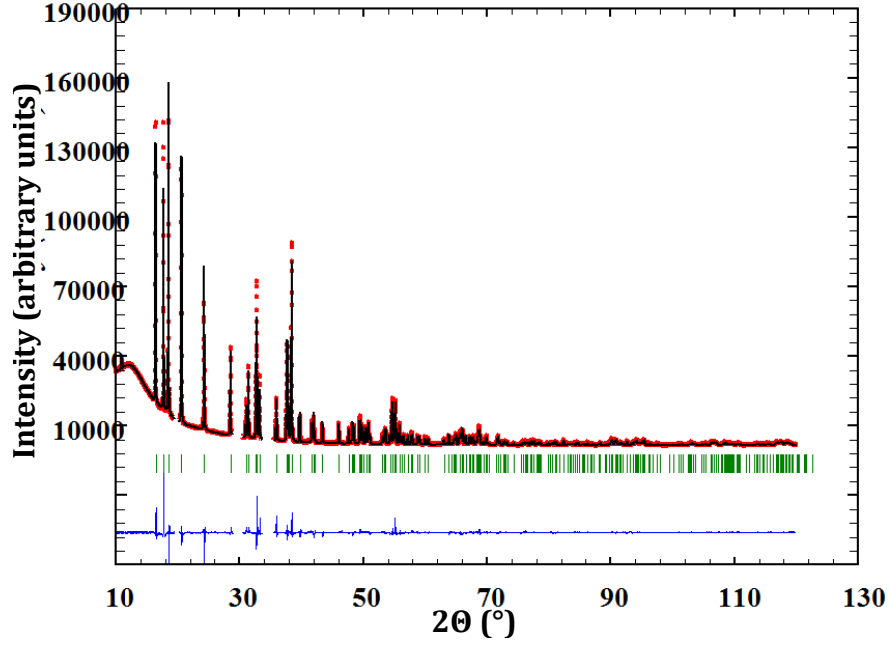

Figure S8: Comparison between the observed ( $Y_{obs}$ , in red) and calculated ( $Y_{calc}$ , in black) X-ray diffraction patterns of  $\text{Na}_5\text{PuO}_6$ .  $Y_{obs}-Y_{calc}$ , in blue, is the difference between the experimental and calculated intensities. The Bragg reflections are marked in green. Measurement at  $\lambda = \text{Cu-K}\alpha 1$ .

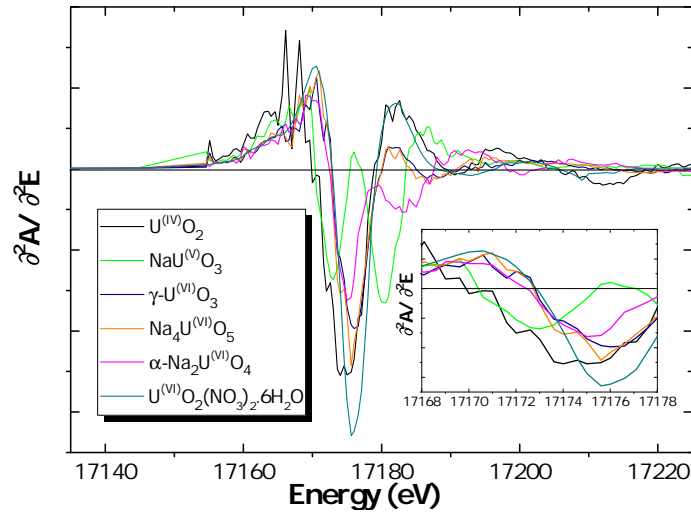

Figure S9: Second derivative of the XANES spectra collected at the U- $L_3$  edge. The second derivative zeros correspond to the inflection points of the spectra and are taken as the energies  $E_0$  of the edge absorption thresholds.

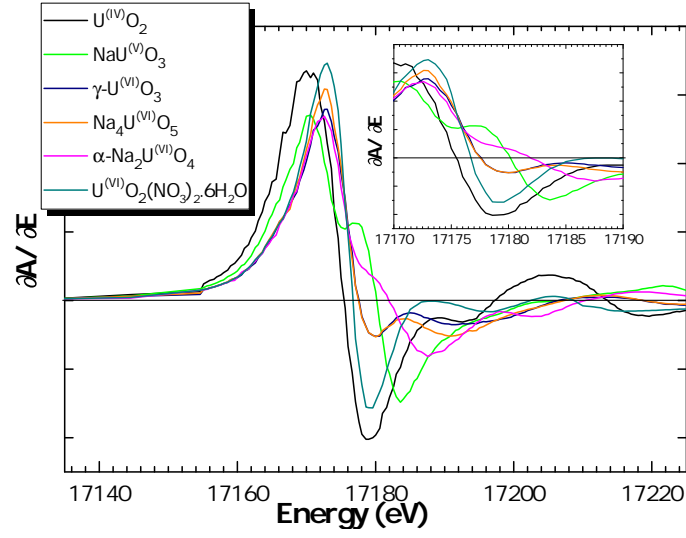

Figure S10: First derivative of the XANES spectra collected at the U-L<sub>3</sub> edge. The first derivative zeros correspond to the positions of the white line maxima.

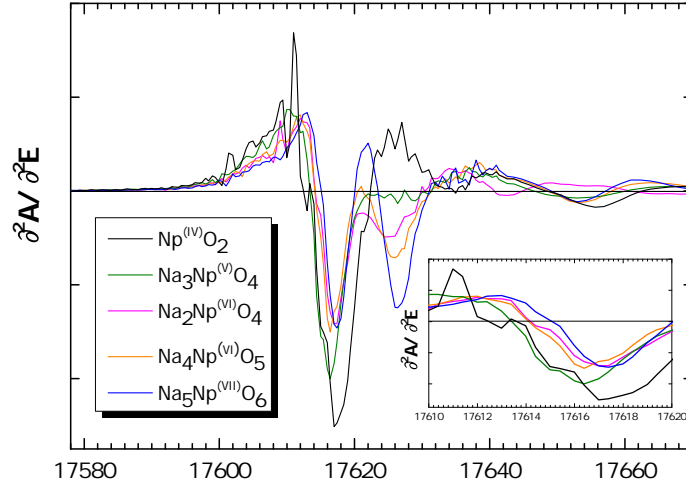

Figure S11: Second derivative of the XANES spectra collected at the Np-L<sub>3</sub> edge. The second derivative zeros correspond to the inflection points of the spectra and are taken as the energies  $E_0$  of the edge absorption thresholds.

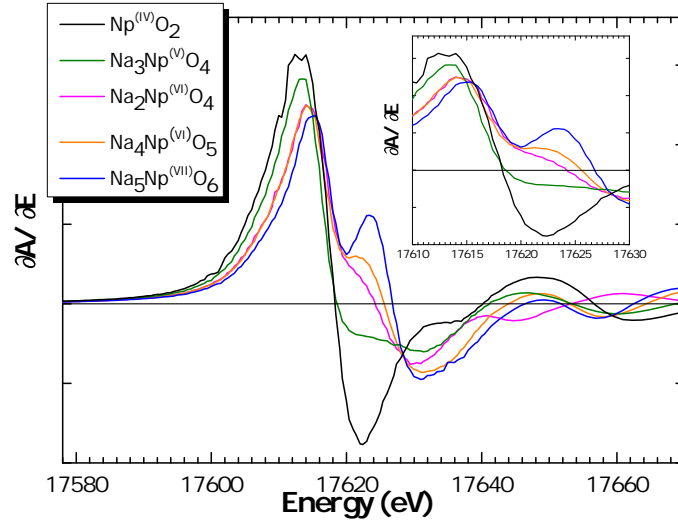

Figure S12: First derivative of the XANES spectra collected at the Np-L<sub>3</sub> edge. The first derivative zeros correspond to the positions of the white line maxima.

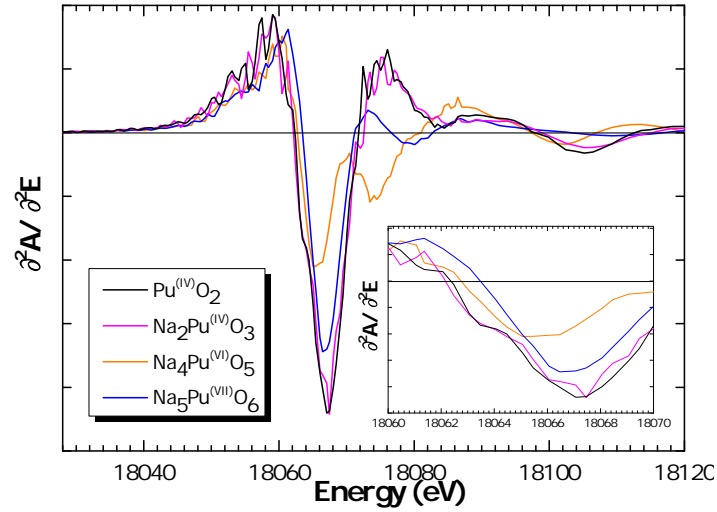

Figure S13: Second derivative of the XANES spectra collected at the Pu-L<sub>3</sub> edge. The second derivative zeros correspond to the inflection points of the spectra and are taken as the energies  $E_0$  of the edge absorption thresholds.



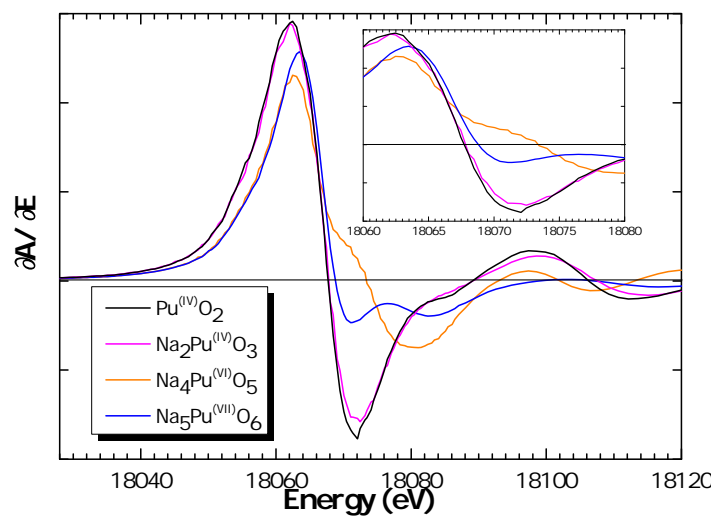

Figure S14: First derivative of the XANES spectra collected at the Pu-L<sub>3</sub> edge. The first derivative zeros correspond to the positions of the white line maxima.
